# Supplementary material for: Pathogenicity Islands Distribution in Non-O157 Shiga Toxin-Producing Escherichia coli (STEC)
Source: Genes (Basel). 2018 Feb 10;9(2):81. doi: 10.3390/genes9020081 (PMC5852577; doi:10.3390/genes9020081)
Supplement: Supplementary file 1 [file genes-09-00081-s001.xls]

## Sheet: Table S1
SEROTYPE	ISOLATE	SOURCE	eae	nle B2	nle C	nle H1-1	nle D	nle G2-3	nle G5-2	nle G6-2	nle A	nle F	nle G	nle G2-1	nle G9	nle H1-2	nle B	nle E	ent / espL2	Z4321	Z4326	Z4332	Z4333	OI 122	SEROPATHOTYPE
O2:H5	1	cattle	-	-	-	-	-	-	-	-	-	-	-	-	-	-	-	-	-	+	-	-	-	INC	ND
O2:NM	2	meat food	-	-	-	-	-	-	-	-	-	-	-	-	-	-	-	-	-	+	-	-	-	INC	ND
O5:NM	3	cattle	+	-	-	+	-	+	-	-	-	-	-	+	+	-	-	+	-	+	+	+	+	CO	C
O5:NM	4	cattle	+	-	-	+	+	+	-	-	-	-	+	+	+	+	-	+	+	+	+	+	+	CO	C
O5:NM	5	cattle	+	-	-	+	-	+	-	-	+	-	+	+	+	+	-	+	-	+	+	+	+	CO	C
O5:NM	6	cattle	+	-	-	+	-	+	-	-	-	-	+	+	+	+	-	+	-	+	+	+	+	CO	C
O8:H16	7	meat food	-	-	-	+	-	-	-	-	-	-	-	-	-	-	-	-	-	+	-	-	-	INC	E
O8:H16	8	meat food	-	-	-	-	-	-	-	-	-	-	-	-	-	-	-	-	-	+	-	-	-	INC	E
O8:H16	9	cattle	-	-	-	-	-	-	-	-	-	-	-	-	-	-	-	-	-	+	-	-	-	INC	E
O8:H19	10	meat food	-	-	-	-	-	-	-	-	-	-	-	-	-	-	-	-	-	-	-	-	-	ABS	E
O8:H19	11	meat food	-	-	-	-	-	-	-	-	-	-	-	-	-	-	-	-	-	-	-	-	-	ABS	E
O8:H19	12	meat food	-	-	-	-	-	-	-	-	-	-	-	-	-	-	-	-	-	-	-	-	-	ABS	E
O8:H19	13	meat food	-	-	-	-	-	-	-	-	-	-	-	-	-	-	-	-	-	-	-	-	-	ABS	E
O8:H19	14	meat food	-	-	-	-	-	-	-	-	-	-	-	-	-	-	-	-	-	-	-	-	-	ABS	E
O8:H19	15	meat food	-	-	-	-	-	-	-	-	-	-	-	-	-	-	-	-	-	-	-	-	-	ABS	E
O8:H19	16	meat food	-	-	-	-	-	-	-	-	-	-	-	-	-	-	-	-	-	-	-	-	-	ABS	E
O8:H19	17	meat food	-	-	-	-	-	-	-	-	-	-	-	-	-	-	-	-	-	-	-	-	-	ABS	E
O8:H19	18	meat food	-	-	-	-	-	-	-	-	-	-	-	-	-	-	-	-	-	-	-	-	-	ABS	E
O15:H21	19	cattle	-	-	-	-	-	-	-	-	-	-	-	-	-	-	-	-	-	+	-	-	-	INC	ND
O20:H7	20	cattle	-	-	-	-	-	-	-	-	-	-	-	-	-	-	-	-	-	-	-	-	-	ABS	ND
O20:H7	21	cattle	-	-	-	-	-	-	-	-	-	-	-	-	-	-	-	-	-	-	-	-	-	ABS	ND
O20:H19	22	meat food	-	-	-	-	-	-	-	-	-	-	-	-	-	-	-	-	-	+	-	-	-	INC	C
O20:H19	23	cattle	-	-	-	-	-	-	-	-	-	-	-	-	-	-	-	-	-	-	-	-	-	ABS	C
O20:H19	24	meat food	-	-	-	-	-	-	-	-	-	-	-	-	-	-	-	-	-	-	-	-	-	ABS	C
O20:H19	25	cattle	-	-	-	-	-	-	-	-	-	-	-	-	-	-	-	-	-	-	-	-	-	ABS	C
O20:H19	26	cattle	-	-	-	-	-	-	-	-	-	-	-	-	-	-	-	-	-	-	-	-	-	ABS	C
O20:H19	27	cattle	-	-	-	-	-	-	-	-	-	-	-	-	-	-	-	-	-	-	-	-	-	ABS	C
O20:H19	28	cattle	-	-	-	-	-	-	-	-	-	-	-	-	-	-	-	-	-	-	-	-	-	ABS	C
O20:HNT	29	cattle	+	-	-	+	-	+	-	-	-	-	+	-	+	+	-	-	-	+	+	+	+	CO	ND
O22:H8	30	meat food	-	-	-	-	-	-	-	-	-	-	-	-	-	-	-	-	-	+	-	-	-	INC	C
O22:H8	31	meat food	-	-	-	-	-	-	-	-	-	-	-	-	-	-	-	-	-	+	-	-	-	INC	C
O22:H8	32	meat food	-	-	-	-	-	-	-	-	-	-	-	-	-	-	-	-	-	+	-	-	-	INC	C
O25:H19	33	cattle	-	-	-	-	-	-	-	-	-	-	-	-	-	-	-	-	-	-	-	-	-	ABS	ND
O26:H11	34	human	+	+	-	+	-	+	+	+	+	+	-	+	+	+	+	+	+	-	+	+	+	INC	B
O26:H11	35	human	+	+	+	+	-	+	+	+	+	+	+	+	+	+	+	+	+	-	+	+	+	INC	B
O26:H11	36	cattle	+	-	-	+	-	+	+	+	+	-	+	+	+	+	-	+	+	-	+	+	+	INC	B
O26:H11	37	cattle	+	-	-	+	-	+	+	+	+	-	+	+	+	+	-	+	+	-	+	+	+	INC	B
O26:H11	38	cattle	+	-	-	+	+	+	+	+	+	-	+	+	+	-	-	+	+	-	+	+	+	INC	B
O26:H11	39	cattle	+	-	-	+	-	+	+	+	+	-	+	+	+	+	-	+	+	-	+	+	+	INC	B
O26:H11	40	cattle	+	-	-	+	-	+	+	+	+	-	+	+	-	-	-	+	+	-	+	+	+	INC	B
O26:H11	41	cattle	+	-	-	+	-	+	+	+	+	+	+	+	+	-	-	+	+	-	+	+	+	INC	B
O38:H39	42	cattle	+	-	-	+	-	+	+	+	+	-	+	+	+	+	-	+	+	-	+	+	+	INC	ND
O39:H49	43	cattle	-	-	-	+	-	-	-	-	-	-	-	-	-	-	-	-	-	+	-	+	+	INC	E
O39:H49	44	cattle	-	-	-	-	-	-	-	-	-	-	-	-	-	-	-	-	-	+	-	-	-	INC	E
O39:H49	45	cattle	-	-	-	-	-	-	-	-	-	-	-	-	-	-	-	-	-	+	-	-	-	INC	E
O79:H19	46	meat food	-	-	-	-	-	-	-	-	-	-	-	-	-	-	-	-	-	-	-	-	-	ABS	ND
O79:H19	47	meat food	-	-	-	-	-	-	-	-	-	-	-	-	-	-	-	-	-	-	-	-	-	ABS	ND
O79:H19	48	cattle	-	-	-	-	-	-	-	-	-	-	-	-	-	-	-	-	-	-	-	-	-	ABS	ND
O88:H21	49	meat food	-	-	-	-	-	-	-	-	-	-	-	-	-	-	-	-	-	+	-	-	-	INC	ND
O91:H21	50	meat food	-	-	-	-	-	-	-	-	-	-	-	-	-	-	-	-	-	+	-	-	-	INC	C
O91:H21	51	cattle	-	-	-	-	-	-	-	-	-	-	-	-	-	-	-	-	-	+	-	-	-	INC	C
O91:H21	52	cattle	-	-	-	-	-	-	-	-	-	-	-	-	-	-	-	-	-	+	-	-	-	INC	C
O91:H21	53	cattle	-	-	-	-	-	-	-	-	-	-	-	-	-	-	-	-	-	+	-	-	-	INC	C
O103:NM	54	cattle	+	-	-	-	-	+	-	-	-	-	-	-	-	-	-	+	-	-	+	+	+	INC	B
O103:NM	55	cattle	+	+	-	+	-	+	-	-	-	-	-	-	-	-	-	+	-	+	+	+	+	CO	B
O103:H2	56	cattle	+	+	-	+	-	+	-	-	-	-	-	-	+	-	-	+	-	+	+	+	+	CO	B
O111:H2	57	human	+	-	-	+	-	+	+	-	-	-	+	-	+	+	+	+	-	+	+	+	+	CO	ND
O111:NM	58	cattle	+	-	-	+	-	+	+	-	-	-	+	+	+	+	-	+	-	+	+	+	+	CO	B
O112:H2	59	meat food	-	-	-	-	-	-	-	-	-	-	-	-	-	-	-	-	-	-	-	-	-	ABS	C
O113:NM	60	meat food	-	-	-	-	-	-	-	-	-	-	-	-	-	-	-	-	-	+	-	-	-	INC	E
O113:NM	61	meat food	-	-	-	-	-	-	-	-	-	-	-	-	-	-	-	-	-	+	-	-	-	INC	E
O113:NM	62	meat food	-	-	-	-	-	-	-	-	-	-	-	-	-	-	-	-	-	+	-	-	-	INC	E
O113:NM	63	meat food	-	-	-	-	-	-	-	-	-	-	-	-	-	-	-	-	-	+	-	-	-	INC	E
O113:NM	64	meat food	-	-	-	-	-	-	-	-	-	-	-	-	-	-	-	-	-	+	-	-	-	INC	E
O113:NM	65	meat food	-	-	-	-	-	-	-	-	-	-	-	-	-	-	-	-	-	+	-	-	-	INC	E
O113:NM	66	meat food	-	-	-	-	-	-	-	-	-	-	-	-	-	-	-	-	-	+	-	-	-	INC	E
O113:NM	67	meat food	-	-	-	-	-	-	-	-	-	-	-	-	-	-	-	-	-	+	-	-	-	INC	E
O113:NM	68	meat food	-	-	-	-	-	-	-	-	-	-	-	-	-	-	-	-	-	+	-	-	-	INC	E
O113:NM	69	meat food	-	-	-	-	-	-	-	-	-	-	-	-	-	-	-	-	-	+	-	-	-	INC	E
O113:H21	70	meat food	-	-	-	-	-	-	-	-	-	-	-	-	-	-	-	-	-	+	-	-	-	INC	C
O113:H21	71	cattle	-	-	-	-	-	-	-	-	-	-	-	-	-	-	-	-	-	+	-	-	-	INC	C
O113:H21	72	cattle	-	-	-	-	-	-	-	-	-	-	-	-	-	-	-	-	-	+	-	-	-	INC	C
O113:H21	73	meat food	-	-	-	-	-	-	-	-	-	-	-	-	-	-	-	-	-	+	-	-	-	INC	C
O113:H21	74	meat food	-	-	-	-	-	-	-	-	-	-	-	-	-	-	-	-	-	-	-	-	-	ABS	C
O113:H21	75	cattle	-	-	-	-	-	-	-	-	-	-	-	-	-	-	-	-	-	+	-	-	-	INC	C
O116:H21	76	meat food	-	-	-	-	-	-	-	-	-	-	-	-	-	-	-	-	-	+	-	-	-	INC	D
O117:H7	77	meat food	-	-	-	-	-	-	-	-	-	-	-	-	-	-	-	-	-	-	-	-	-	ABS	D
O117:H7	78	meat food	-	-	-	-	-	-	-	-	-	-	-	-	-	-	-	-	-	+	-	-	-	INC	D
O117:H7	79	meat food	-	-	-	-	-	-	-	-	-	-	-	-	-	-	-	-	-	+	-	-	-	INC	D
O117:H7	80	cattle	-	-	-	-	-	-	-	-	-	-	-	-	-	-	-	-	-	+	-	-	-	INC	D
O117:H7	81	cattle	-	-	-	-	-	-	-	-	-	-	-	-	-	-	-	-	-	+	-	-	-	INC	D
O117:H7	82	cattle	-	-	-	-	-	-	-	-	-	-	-	-	-	-	-	-	-	-	-	-	-	ABS	D
O117:H7	83	cattle	-	-	-	-	-	-	-	-	-	-	-	-	-	-	-	-	-	+	-	-	-	INC	D
O117:H7	84	cattle	-	-	-	-	-	-	-	-	-	-	-	-	-	-	-	-	-	+	-	-	-	INC	D
O118:H2	85	human	+	+	-	+	+	+	-	-	-	+	-	-	+	+	+	+	-	+	+	+	+	CO	ND
O118:H16	86	cattle	+	-	-	+	+	+	+	+	+	-	+	+	+	+	-	+	+	+	+	+	+	CO	C
O120:H19	87	cattle	-	-	-	-	-	-	-	-	-	-	-	-	-	-	-	-	-	-	-	-	-	ABS	ND
O121:H19	88	human	+	-	-	+	-	+	+	+	+	+	-	-	-	-	+	+	+	+	+	+	+	CO	B
O128:NM	89	human	+	-	-	-	-	+	-	-	-	-	-	-	-	-	+	-	-	-	-	-	-	ABS	ND
O141:H7	90	cattle	-	-	-	-	-	-	-	-	-	-	-	-	-	-	-	-	-	-	-	-	-	ABS	ND
O141:H8	91	cattle	-	-	-	+	-	+	-	-	-	-	-	-	+	-	-	-	-	+	-	-	-	INC	ND
O141:H8	92	cattle	-	-	-	-	-	-	-	-	-	-	-	-	-	-	-	-	-	-	-	-	-	ABS	ND
O145:NM	93	human	+	+	-	-	-	+	+	-	+	+	-	-	+	-	+	+	+	-	+	+	+	INC	B
O145:NM	94	human	+	+	+	-	-	+	+	-	+	+	-	-	+	-	+	+	+	-	+	+	+	INC	B
O145:NM	95	human	+	-	-	-	-	-	-	-	-	-	-	-	-	-	-	-	-	-	-	-	-	ABS	B
O145:NM	96	human	+	+	-	-	-	+	+	-	+	+	-	-	-	-	+	+	+	-	+	+	+	INC	B
O145:NM	97	human	+	+	+	-	-	+	+	-	+	+	-	-	+	-	+	+	+	-	+	+	+	INC	B
O145:NM	98	human	+	-	-	-	-	+	-	-	-	-	-	-	-	-	-	-	-	-	-	-	-	ABS	B
O145:NM	99	cattle	+	+	-	-	+	+	+	-	+	-	-	+	-	-	-	+	+	-	+	+	+	INC	B
O145:NM	100	cattle	+	+	-	-	-	+	+	-	+	-	-	+	-	-	-	+	+	-	+	+	+	INC	B
O145:NM	101	cattle	+	+	-	-	-	+	+	-	+	-	-	-	-	-	-	+	+	-	+	+	+	INC	B
O145:NM	102	cattle	+	+	-	-	-	+	+	-	+	-	-	+	-	-	-	+	+	-	+	+	+	INC	B
O145:NM	103	cattle	+	+	-	-	+	+	+	-	+	+	-	+	-	-	+	+	+	-	+	+	+	INC	B
O145:NM	104	cattle	+	+	-	-	-	+	+	-	+	+	-	+	-	-	+	+	+	-	+	+	+	INC	B
O145:NM	105	cattle	+	+	-	-	-	+	+	-	-	+	-	+	+	-	+	+	+	-	+	+	+	INC	B
O145:NM	106	cattle	+	+	-	-	-	+	+	-	+	+	-	+	+	-	+	+	+	-	+	+	+	INC	B
O145:NM	107	cattle	+	+	-	-	-	+	+	-	+	+	-	-	-	-	+	+	+	-	+	+	+	INC	B
O145:NM	108	cattle	+	+	-	-	-	+	+	-	+	+	-	-	+	-	+	+	+	-	+	+	+	INC	B
O145:NM	109	cattle	+	+	-	-	-	+	+	-	+	+	-	-	+	-	+	+	+	-	+	+	+	INC	B
O145:NM	110	cattle	+	+	-	-	-	+	+	-	+	-	+	-	+	-	-	+	+	-	+	+	+	INC	B
O146:NM	111	cattle	+	+	-	-	-	+	+	-	+	-	-	-	+	-	-	+	+	-	+	+	+	INC	D
O146:H21	112	cattle	+	+	-	+	-	+	+	-	+	+	-	-	-	-	+	+	+	+	+	+	+	CO	D
O162:H7	113	meat food	-	-	-	-	-	-	-	-	-	-	-	-	+	-	-	-	-	+	+	-	-	INC	ND
O165:NM	114	cattle	+	+	+	+	+	+	+	-	-	+	-	+	+	+	+	+	+	-	+	+	+	INC	ND
O171:HNT	115	meat food	-	-	-	-	-	-	-	-	-	-	-	-	-	-	-	-	-	+	-	-	-	INC	ND
O171:H2	116	meat food	-	-	-	-	-	-	-	-	-	-	-	-	+	-	-	-	-	+	-	-	-	INC	D
O171:H2	117	cattle	-	-	-	-	-	-	-	-	-	-	-	-	-	-	-	-	-	+	-	-	-	INC	D
O171:H2	118	cattle	-	-	-	-	-	-	-	-	-	-	-	-	-	-	-	-	-	+	-	-	-	INC	D
O171:H2	119	cattle	-	-	-	-	-	-	-	-	-	-	-	-	-	-	-	-	-	+	-	-	-	INC	D
O171:H2	120	cattle	-	-	-	-	-	-	-	-	-	-	-	-	-	-	-	-	-	+	-	-	-	INC	D
O171:H2	121	cattle	-	-	-	-	-	-	-	-	-	-	-	-	-	-	-	-	-	+	-	-	-	INC	D
O171:H2	122	cattle	-	-	-	-	-	-	-	-	-	-	-	-	-	-	-	-	-	+	-	-	-	INC	D
O171:H2	123	cattle	-	-	-	-	-	-	-	-	-	-	-	-	-	-	-	-	-	+	-	-	-	INC	D
O171:H2	124	cattle	-	-	-	-	-	-	-	-	-	-	-	-	-	-	-	-	-	-	-	-	-	ABS	D
O171:H2	125	cattle	-	-	-	-	-	-	-	-	-	-	-	-	-	-	-	-	-	+	-	-	-	INC	D
O171:H2	126	cattle	-	-	-	-	-	-	-	-	-	-	-	-	-	-	-	-	-	+	-	-	-	INC	D
O171:NM	127	cattle	-	-	-	-	-	-	-	-	-	-	-	-	-	-	-	-	-	+	-	-	-	INC	ND
O171:NM	128	cattle	-	-	-	-	-	-	-	-	-	-	-	-	-	-	-	-	-	-	-	-	-	ABS	ND
O171:NM	129	meat food	-	-	-	-	-	-	-	-	-	-	-	-	+	-	-	-	-	+	-	-	-	INC	ND
O171:NM	130	meat food	-	-	-	-	-	-	-	-	-	-	-	-	-	-	-	-	-	+	-	-	-	INC	ND
O174:H21	131	meat food	-	-	-	-	-	-	-	-	-	-	-	-	-	-	-	-	-	+	-	-	-	INC	C
O174:H21	132	meat food	-	-	-	-	-	-	-	-	-	-	-	-	-	-	-	-	-	+	-	-	-	INC	C
O174:H21	133	meat food	-	-	-	-	-	-	-	-	-	-	-	-	-	-	-	-	-	+	-	-	-	INC	C
O174:H21	134	meat food	-	-	-	-	-	-	-	-	-	-	-	-	-	-	-	-	-	+	-	-	-	INC	C
O174:H21	135	meat food	-	-	-	-	-	-	-	-	-	-	-	-	-	-	-	-	-	+	-	-	-	INC	C
O174:H21	136	meat food	-	-	-	-	-	-	-	-	-	-	-	-	-	-	-	-	-	+	-	-	-	INC	C
O174:H21	137	cattle	-	-	-	-	-	-	-	-	-	-	-	-	-	-	-	-	-	+	-	-	-	INC	C
O174:H21	138	cattle	-	-	-	-	-	-	-	-	-	-	-	-	-	-	-	-	-	+	-	-	-	INC	C
O174:H21	139	cattle	-	-	-	-	-	-	-	-	-	-	-	-	-	-	-	-	-	+	-	-	-	INC	C
O174:H21	140	cattle	-	-	-	-	-	-	-	-	-	-	-	-	-	-	-	-	-	-	-	-	-	ABS	C
O174:H21	141	cattle	-	-	-	-	-	-	-	-	-	-	-	-	-	-	-	-	-	+	-	-	-	INC	C
O174:H21	142	cattle	-	-	-	-	-	-	-	-	-	-	-	-	-	-	-	-	-	+	-	-	-	INC	C
O174:H21	143	cattle	-	-	-	-	-	-	-	-	-	-	-	-	-	-	-	-	-	+	-	-	-	INC	C
O174:H21	144	cattle	-	-	-	-	-	-	-	-	-	-	-	-	-	-	-	-	-	+	-	-	-	INC	C
O174:H21	145	cattle	-	-	-	-	-	-	-	-	-	-	-	-	-	-	-	-	-	+	-	-	-	INC	C
O175:H8	146	cattle	-	-	-	-	-	-	-	-	-	-	-	-	-	-	-	-	-	-	-	-	-	ABS	ND
O175:H8	147	cattle	-	-	-	-	-	-	-	-	-	-	-	-	-	-	-	-	-	-	-	-	-	ABS	ND
O177:NM	148	cattle	+	-	-	+	+	+	+	-	+	-	-	-	+	+	-	+	+	-	+	-	-	INC	ND
O177:NM	149	cattle	+	-	-	+	+	+	+	-	-	+	-	-	+	+	+	+	+	-	+	-	-	INC	ND
O177:NM	150	cattle	+	-	-	+	+	+	+	-	-	-	-	-	+	+	+	+	+	-	+	-	-	INC	ND
O178:H19	151	vegetable	-	-	-	-	-	-	-	-	-	-	-	-	-	-	-	-	-	-	-	-	-	ABS	ND
O178:H19	152	meat food	-	-	-	-	-	-	-	-	-	-	-	-	-	-	-	-	-	+	-	-	-	INC	ND
O178:H19	153	meat food	-	-	-	-	-	-	-	-	-	-	-	-	-	-	-	-	-	-	-	-	-	ABS	ND
O178:H19	154	meat food	-	-	-	-	-	-	-	-	-	-	-	-	-	-	-	-	-	+	-	-	-	INC	ND
O178:H19	155	cattle	-	-	-	-	-	-	-	-	-	-	-	-	-	-	-	-	-	+	-	-	-	INC	ND
O178:H19	156	cattle	-	-	-	-	-	-	-	-	-	-	-	-	-	-	-	-	-	+	-	-	-	INC	ND
O178:H19	157	meat food	-	-	-	-	-	-	-	-	-	-	-	-	-	-	-	-	-	-	-	-	-	ABS	ND
O178:H19	158	meat food	-	-	-	-	-	-	-	-	-	-	-	-	-	-	-	-	-	-	-	-	-	ABS	ND
O185:H7	159	meat food	-	-	-	-	-	-	-	-	-	-	-	-	-	-	-	-	-	+	-	-	-	INC	ND
ONT:H7	160	meat food	-	-	-	-	-	-	-	-	-	-	-	-	-	-	-	-	-	+	-	-	-	INC	ND
ONT:H7	161	meat food	-	-	-	-	-	-	-	-	-	-	-	-	-	-	-	-	-	+	-	-	-	INC	ND
ONT:H7	162	meat food	-	-	-	-	-	-	-	-	-	-	-	-	-	-	-	-	-	+	-	-	-	INC	ND
ONT:H7	163	meat food	-	-	-	-	-	-	-	-	-	-	-	-	-	-	-	-	-	+	-	-	-	INC	ND
ONT:H7	164	meat food	-	-	-	-	-	-	-	-	-	-	-	-	-	-	-	-	-	+	-	-	-	INC	ND
ONT:H8	165	cattle	-	-	-	-	-	-	-	-	-	-	-	-	-	-	-	-	-	+	-	-	-	INC	ND
ONT:H8	166	meat food	-	-	-	-	-	-	-	-	-	-	-	-	-	-	-	-	-	+	-	-	-	INC	ND
ONT:H19	167	meat food	-	-	-	-	-	-	-	-	-	-	-	-	-	-	-	-	-	-	-	-	-	ABS	ND
ONT:H19	168	meat food	-	-	-	-	-	-	-	-	-	-	-	-	-	-	-	-	-	-	-	-	-	ABS	ND
ONT:H19	169	meat food	-	-	-	-	-	-	-	-	-	-	-	-	-	-	-	-	-	-	-	-	-	ABS	ND
ONT:H21	170	meat food	-	-	-	-	-	-	-	-	-	-	-	-	-	-	-	-	-	+	-	-	-	INC	ND
ONT:H21	171	meat food	-	-	-	-	-	-	-	-	-	-	-	-	-	-	-	-	-	-	-	-	-	ABS	ND
ONT:H21	172	meat food	-	-	-	-	-	-	-	-	-	-	-	-	-	-	-	-	-	+	-	-	-	INC	ND
ONT:H21	173	cattle	-	-	-	-	-	-	-	-	-	-	-	-	-	-	-	-	-	+	-	-	-	INC	ND
ONT:H21	174	cattle	-	-	-	-	-	-	-	-	-	-	-	-	-	-	-	-	-	+	-	-	-	INC	ND
ONT:H21	175	cattle	-	-	-	-	-	-	-	-	-	-	-	-	-	-	-	-	-	+	-	-	-	INC	ND
ONT:H21	176	cattle	-	-	-	-	-	-	-	-	-	-	-	-	-	-	-	-	-	+	-	-	-	INC	ND
ONT:H21	177	cattle	-	-	-	-	-	-	-	-	-	-	-	-	-	-	-	-	-	+	-	-	-	INC	ND
ONT:H21	178	cattle	-	-	-	-	-	-	-	-	-	-	-	-	-	-	-	-	-	+	-	-	-	INC	ND
ONT:H21	179	cattle	-	-	-	-	-	-	-	-	-	-	-	-	-	-	-	-	-	+	-	-	-	INC	ND
ONT:H21	180	cattle	-	-	-	-	-	-	-	-	-	-	-	-	-	-	-	-	-	+	-	-	-	INC	ND
ONT:H21	181	cattle	-	-	-	-	-	-	-	-	-	-	-	-	-	-	-	-	-	+	-	-	-	INC	ND
ONT:H21	182	meat food	-	-	-	-	-	-	-	-	-	-	-	-	-	-	-	-	-	+	-	-	-	INC	ND
ONT:H21	183	cattle	-	-	-	-	-	-	-	-	-	-	-	-	-	-	-	-	-	+	-	-	-	INC	ND
ONT:HNT	184	meat food	-	-	-	-	-	-	-	-	-	-	-	-	-	-	-	-	-	+	-	-	-	INC	ND
ONT:HNT	185	meat food	-	-	-	-	-	-	-	-	-	-	-	-	-	-	-	-	-	-	-	-	-	ABS	ND
ONT:HNT	186	meat food	-	-	-	-	-	-	-	-	-	-	-	-	-	-	-	-	-	-	-	-	-	ABS	ND
ONT:HNT	187	meat food	-	-	-	-	-	-	-	-	-	-	-	-	-	-	-	-	-	-	-	-	-	ABS	ND
ONT:NM	188	cattle	-	-	-	-	-	-	-	-	-	-	-	-	-	-	-	-	-	+	-	-	-	INC	ND
ONT:NM	189	cattle	-	-	-	-	-	-	-	-	-	-	-	-	-	-	-	-	-	+	-	-	-	INC	ND
ONT:NM	190	cattle	-	-	-	-	-	-	-	-	-	-	-	-	-	-	-	-	-	+	-	-	-	INC	ND
ONT:NM	191	cattle	-	-	-	-	-	-	-	-	-	-	-	-	-	-	-	-	-	+	-	-	-	INC	ND
ONT:NM	192	cattle	-	-	-	-	-	-	-	-	-	-	-	-	-	-	-	-	-	+	-	-	-	INC	ND
ONT:NM	193	cattle	-	-	-	-	-	-	-	-	-	-	-	-	-	-	-	-	-	+	-	-	-	INC	ND
ONT:NM	194	cattle	-	-	-	-	-	-	-	-	-	-	-	-	-	-	-	-	-	+	-	-	-	INC	ND
ONT:NM	195	cattle	-	-	-	-	-	-	-	-	-	-	-	-	-	-	-	-	-	+	-	-	-	INC	ND
ONT:NM	196	cattle	-	-	-	-	-	-	-	-	-	-	-	-	-	-	-	-	-	+	-	-	-	INC	ND
ONT:NM	197	cattle	-	-	-	-	-	-	-	-	-	-	-	-	-	-	-	-	-	+	-	-	-	INC	ND
ONT:NM	198	cattle	-	-	-	-	-	-	-	-	-	-	-	-	-	-	-	-	-	+	-	-	-	INC	ND
ONT:NM	199	cattle	-	-	-	-	-	-	-	-	-	-	-	-	-	-	-	-	-	+	-	-	-	INC	ND
ONT:NM	200	cattle	-	-	-	-	-	-	-	-	-	-	-	-	-	-	-	-	-	+	-	-	-	INC	ND
ONT:NM	201	cattle	-	-	-	-	-	-	-	-	-	-	-	-	-	-	-	-	-	+	-	-	-	INC	ND
ONT:NM	202	cattle	-	-	-	-	-	-	-	-	-	-	-	-	-	-	-	-	-	+	-	-	-	INC	ND
ONT:NM	203	cattle	-	-	-	-	-	-	-	-	-	-	-	-	-	-	-	-	-	+	-	-	-	INC	ND
ONT:NM	204	vegetable	-	-	-	-	-	-	-	-	-	-	-	-	-	-	-	-	-	-	-	-	-	ABS	ND
